# Supplementary material for: Membranes Based on Polyvinylidene Fluoride and Radiation-Grafted Sulfonated Polystyrene and Their Performance in Proton-Exchange Membrane Fuel Cells
Source: MDPI journal article supplement (doi:10.3390/polym14183833), 2022-09-14
Supplement: s1 [file s1]

# Supplementary materials for article “Membranes Based on Polyvinylidene Fluoride and Radiation-Grafted Sulfonated Polystyrene and Their Performance in Proton-Exchange Membrane Fuel Cells”

Daniil V. Golubenko <sup>1</sup>, Oleg V. Korchagin <sup>2</sup>, Daria Yu. Voropaeva <sup>1</sup>, Vera A. Bogdanovskaya <sup>2</sup> and Andrey B. Yaroslavl'tsev <sup>1</sup>

<sup>1</sup> Kurnakov Institute of General and Inorganic Chemistry RAS, 31 Leninsky Avenue, 119991, Moscow, Russian Federation

<sup>2</sup> Frumkin Institute of Physical Chemistry and Electrochemistry RAS, 31 Leninsky Avenue, 119071, Moscow, Russian Federation

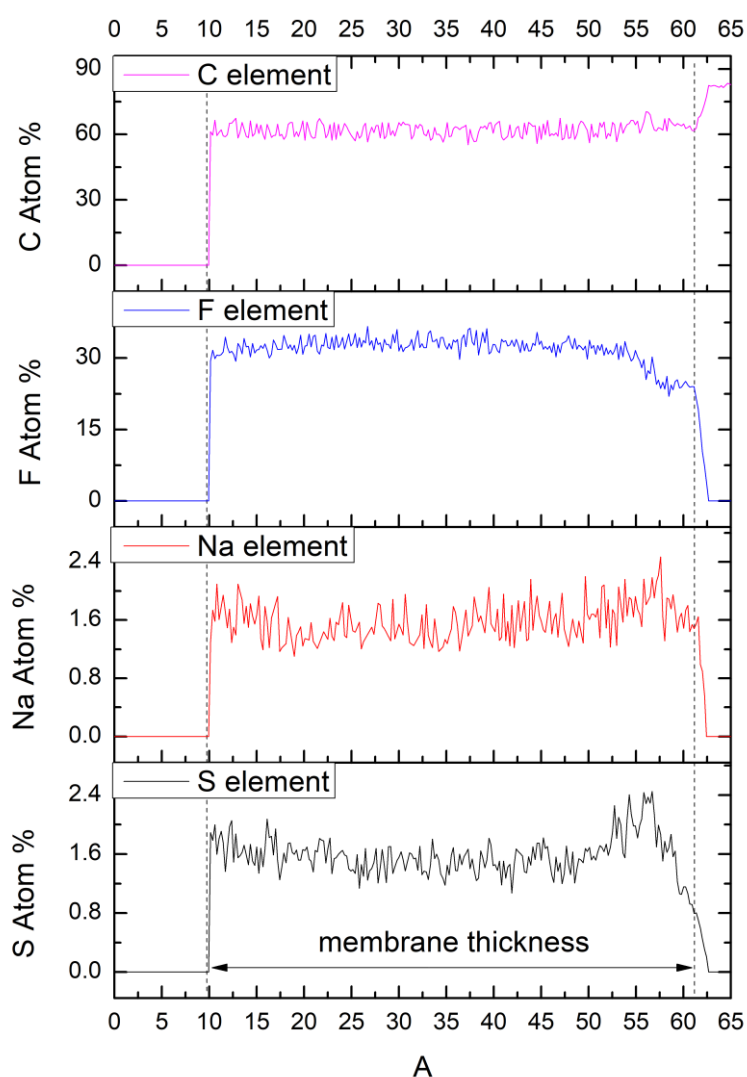

Figure S1. The atomic concentration profile for MSC-0.

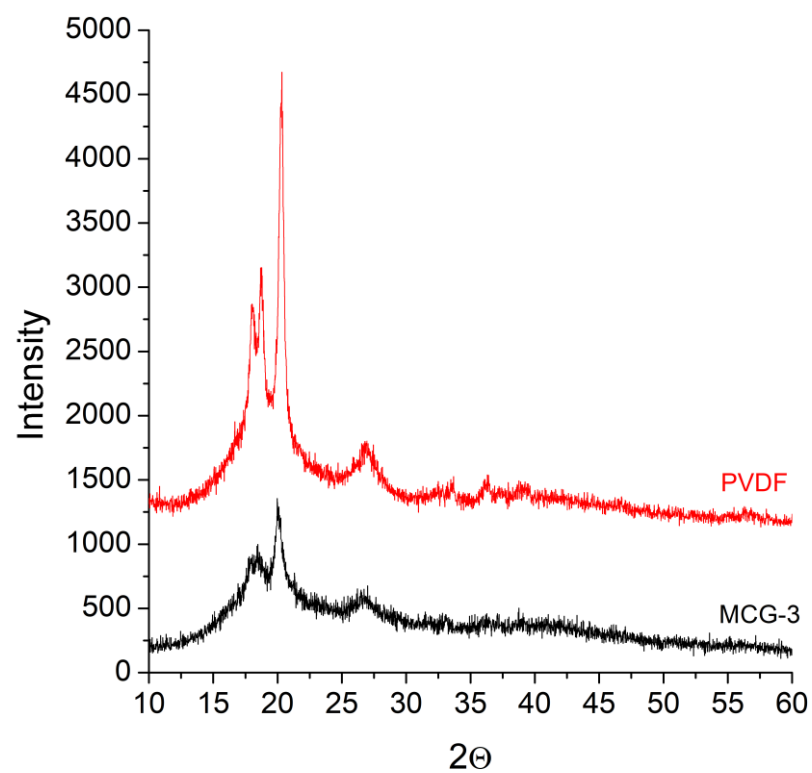

Figure S2. The XRD pattern of initial PVDF film and MGC-3 membrane.
